# Supplementary material for: Derivation of Oligodendrocyte Precursors from Adult Bone Marrow Stromal Cells for Remyelination Therapy
Source: MDPI journal article supplement (doi:10.3390/cells10082166), 2021-08-22
Supplement: s1 [file s1]

Supplementary Figure S1

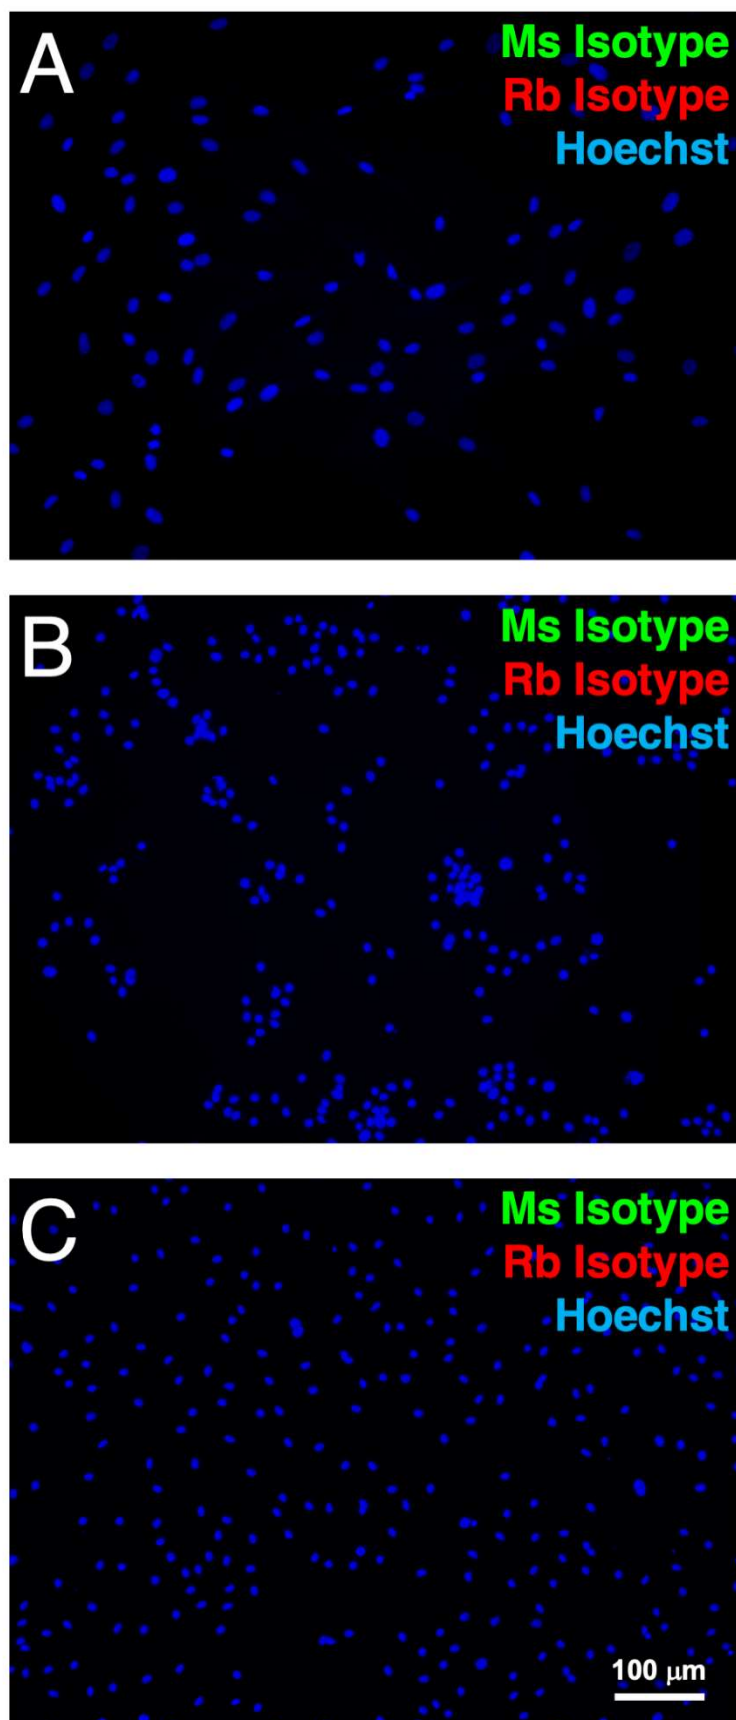

## Supplementary Figure S2

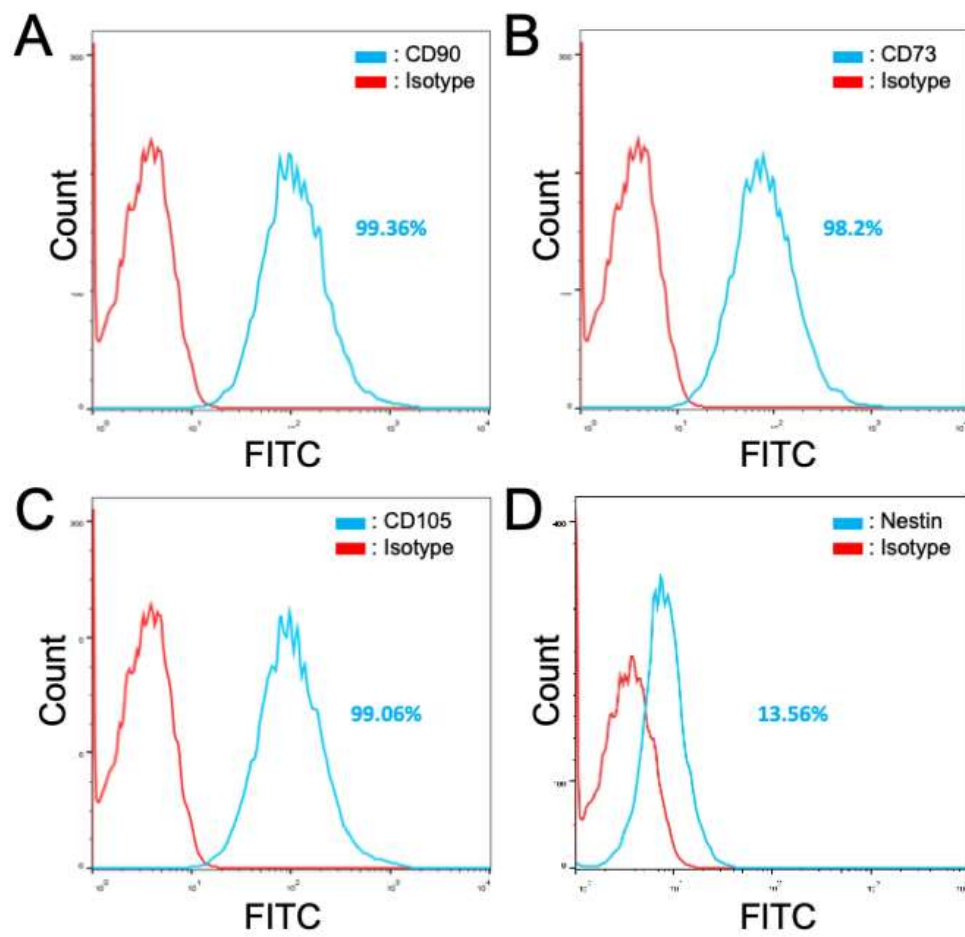

## Supplementary Figure S3

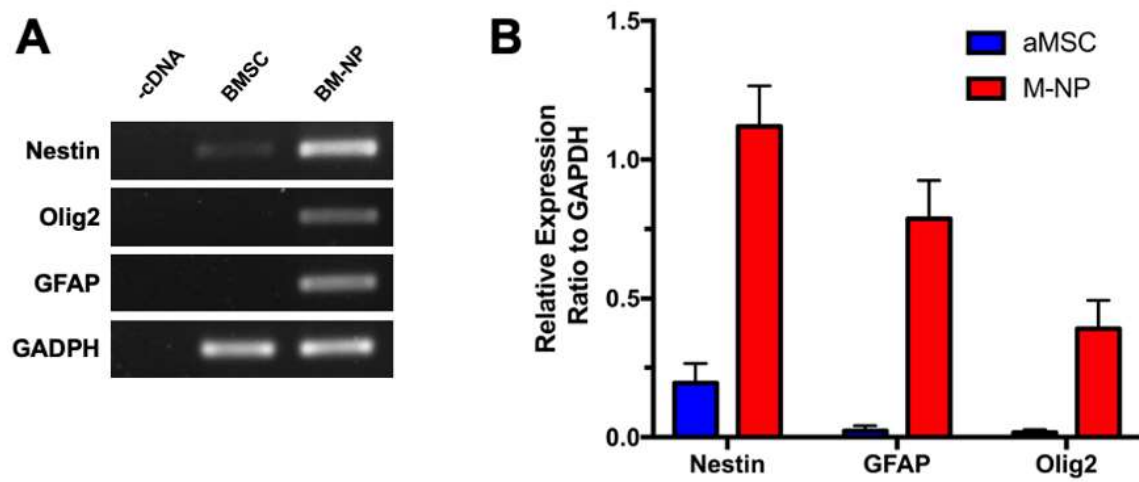

## Supplementary Figure S4

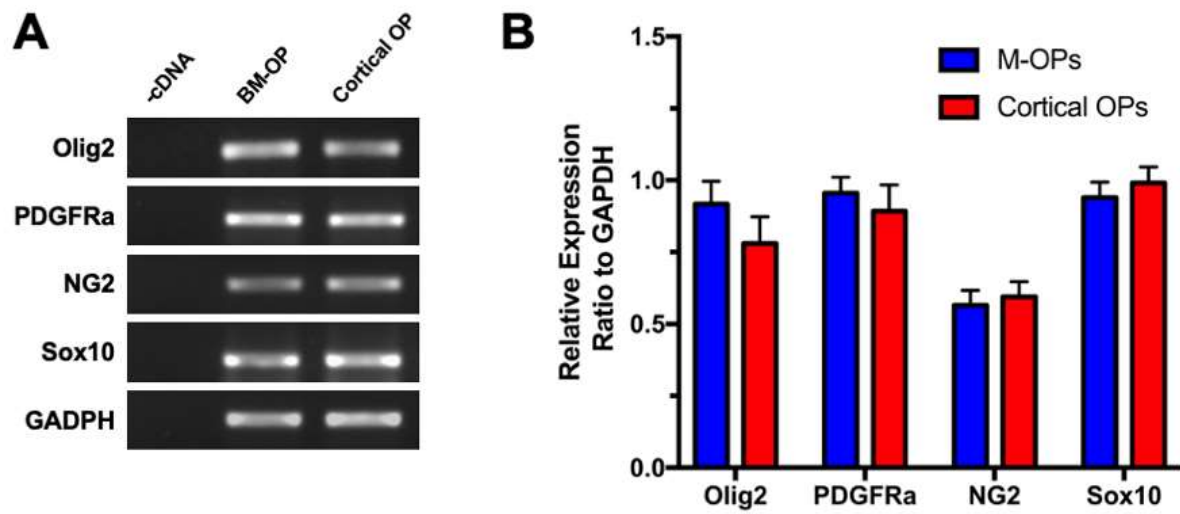

**Supplementary Figure S5**

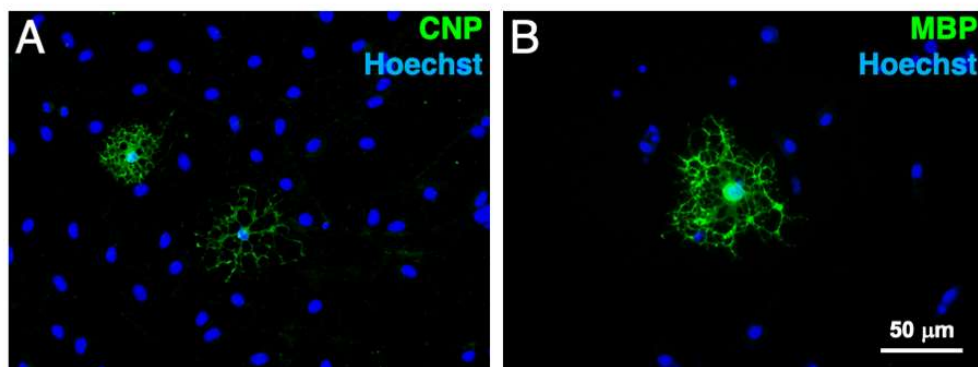

**Supplementary Figure S6**

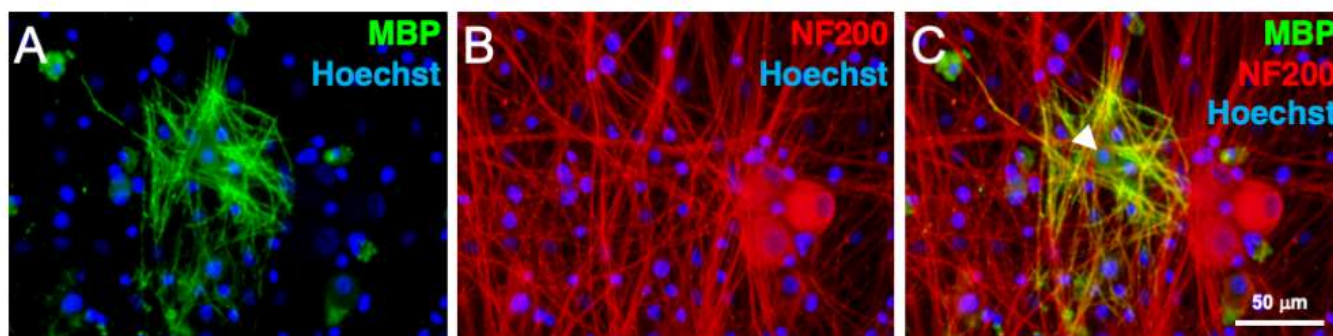

## Supplementary Figure S7

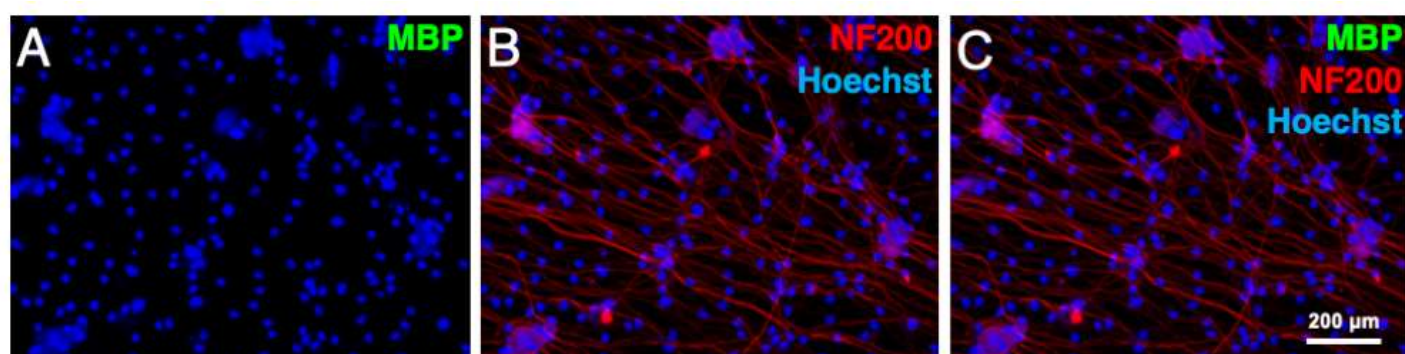



**Supplementary Figure S8**

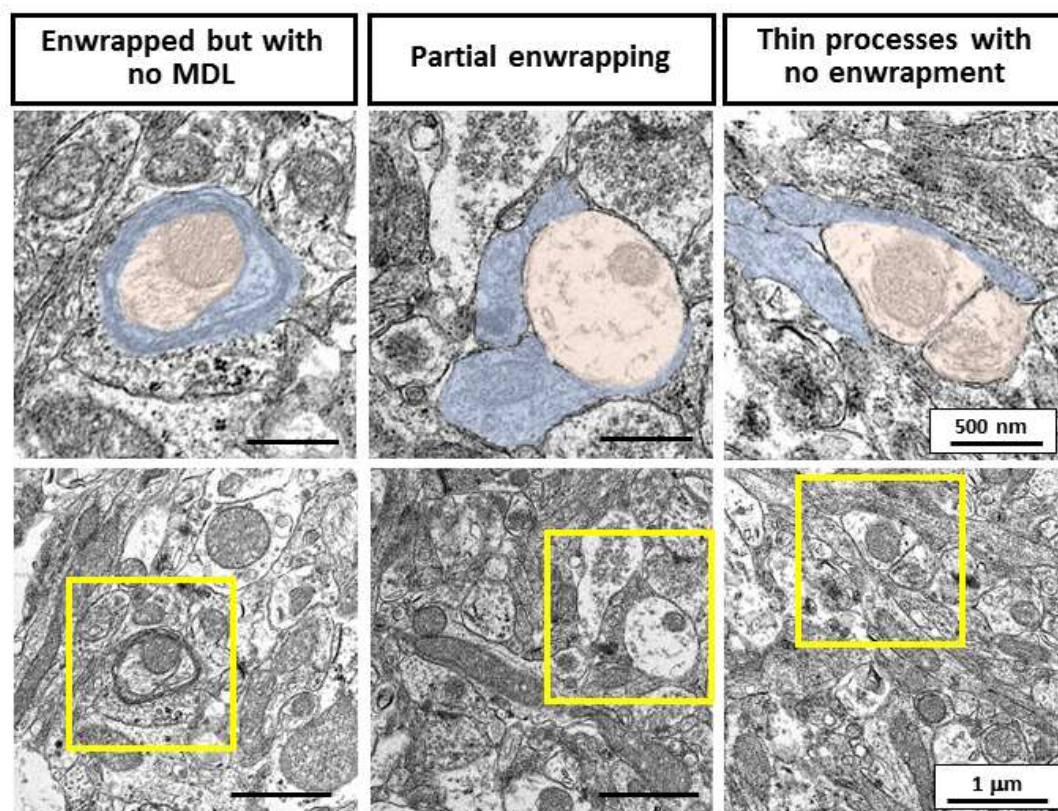



## Supplementary Figure Legends

### **Figure S1: Isotype controls for immunocytochemistry experiments.**

Isotype control staining were performed on aMSCs (A), dissociated neurospheres (B) and M-OPs (C). Nonspecific signals were undetectable. n = 4 independent preparations.

### **Figure S2: Flow cytometry characterization of recovered aMSCs from cryopreservation.**

aMSCs recovered from cryopreservation, between passages 3 – 5, were characterized by flow cytometry. Histograms of a representative experiment were shown. Mesenchymal stem cell markers CD90, CD73 and CD105 were found positive in 99.36% (A), 98.2% (B) and 99.06% (C) of cells, respectively. Neural progenitor marker nestin was positive in 13.56% of cells (D). Marker expression profile was not different before and after cryopreservation. n = 4 independent preparations.

### **Figure S3: Semi-quantitative RT-PCR analysis of aMSC-derived neurospheres.**

Expression of nestin, GFAP and Olig2 in neurosphere cultures were compared to those of aMSCs. Nestin expression in neurospheres higher than that of aMSCs, while signals of GFAP and Olig2 were almost undetectable in aMSCs (A). Quantified signal intensities presented in bar chart (B). n = 4 independent preparations. \*: p-value < 0.001.

### **Figure S4: Semi-quantitative RT-PCR analysis of aMSC-derived OPs.**

Expression of Olig2, PDGFR $\alpha$ , NG2, and Sox10 in derived M-OPs cultures were comparable to that of primary OP cultures prepared from neonatal rat cortices (A). Quantified signal intensities presented in bar chart (B). n = 4 independent preparations.

### **Figure S5: Maturation of OP-like cells into OLs after mitogen withdrawal.**

CNPase-positive (A) and MBP-positive (B) mature OLs were derived from OP-like cells after mitogen withdrawal. n = 4 independent preparations.

### **Figure S6: aMSC-derived OPs recovered from cryopreservation generated myelin-forming OLs.**

OPs recovered from cryopreservation matured into MBP-positive OLs (A) with process extended along NF200-positive axons (B, merged image in C). OL cell body indicated by white arrow (C). n = 4 independent preparations.

### **Figure S7: Undifferentiated aMSCs did not generate OLs in co-culture with dorsal root ganglion neurons.**

No MBP-positive cells (A) were detected 2 weeks after co-culture of aMSCs and purified dorsal root ganglion neurons (marked by NF200 in B). Merged image is shown in panel C. This indicated that aMSCs were incapable of generating myelin-forming OLs if the glial induction procedure was omitted. n = 4 independent preparations.

**Figure S8: Ultrastructure of myelin in vehicle controls 12 weeks post-transplantation.**

Regions boxed in yellow are magnified in the respective upper panels. Majority of OLs (blue) in shiverer mice displayed no/ partial enwrapping of axons (orange) 12 weeks post-injection of medium. Out of more than 1,000 axons that were analyzed in medium-injected shiverer mice, only one OL (left panels) was found to enwrap an axon.

**Table S1: Primary antibodies for immunofluorescence**

| Antibody            | Concentration | Manufacturer   |
|---------------------|---------------|----------------|
| Nestin (Mouse IgG)  | 1:200         | BD Pharmingen  |
| GFAP (Rabbit IgG)   | 1:500         | Abcam          |
| Olig2 (Rabbit IgG)  | 1:400         | Abcam          |
| NG2 (Rabbit IgG)    | 1:200         | EMD Millipore  |
| PDGFRa (Rabbit IgG) | 1:500         | Abcam          |
| Sox10 (Mouse IgG)   | 1:500         | R&D Systems    |
| MBP (Mouse IgG)     | 1:500         | EMD Millipore  |
| NF200 (Rabbit IgG)  | 1:200         | Sigma-Aldrich  |
| RIP (Mouse IgG)     | 1:200         | Hybridoma Bank |

**Table S2: Primary antibodies for flow cytometry**

| Antibody            | Concentration | Manufacturer  |
|---------------------|---------------|---------------|
| CD90 (Mouse IgG)    | 1:200         | BD Pharmingen |
| CD73 (Mouse IgG)    | 1:200         | BD Pharmingen |
| CD105 (Mouse IgM)   | 1:200         | BD Pharmingen |
| CD45 (Mouse IgG)    | 1:200         | BD Pharmingen |
| Nestin (Mouse IgG)  | 1:200         | BD Pharmingen |
| Olig2 (Rabbit IgG)  | 1:400         | Abcam         |
| NG2 (Rabbit IgG)    | 1:200         | EMD Millipore |
| PDGFRa (Rabbit IgG) | 1:500         | Abcam         |
| Sox10 (Mouse IgG)   | 1:500         | R&D Systems   |

**Table S3: Primers for RT-PCR**

| Marker | Forward primer                       | Reverse primer                     |
|--------|--------------------------------------|------------------------------------|
| Nestin | AACCACAGGAGTGGGAACTG                 | GGGTCCTCTAGCCCTACCAC               |
| GFAP   | TGCCATACAGTGTGAGGGCCT<br>AAA         | GCCAAGAACCAAGTTTCACAC<br>GCT       |
| Olig2  | ACTGATACGGGACTGGATGC                 | AACACCCCCTCCCAAATAAC               |
| NG2    | ACTCTCCCTCCCTGGTGTTC                 | GTCAATGTTTCCATGCTCTGCC             |
| PDGFRa | GAAGGCGCAGAAGCAATAAC                 | AAACGCGTGGTAAACAGACC               |
| Sox10  | AGGGTATGGTGGGAAACCTC<br>AC           | GGTGAAAGGATCAGAGTGTCC<br>A         |
| GAPDH  | GTC TCA TAG ACA AGA TGG<br>TGA AGG T | TCT TGA GGG AGT TGT CAT<br>ATT TCT |

**Table S4. Rat MSC proliferation assay**

| No. of Passage | Time needed to reach ~80% confluence (hr) | MSC Yield (No. of cell per well) | Population Increase (%) |
|----------------|-------------------------------------------|----------------------------------|-------------------------|
| P4             | 31.17±0.76                                | 7.48±0.42 x 10 <sup>5</sup>      | 259.54±14.45            |
| P5             | 31.33±1.26                                | 7.88±0.43 x 10 <sup>5</sup>      | 273.72±14.79            |
| P6             | 30.67±1.04                                | 8.55±0.52 x 10 <sup>5</sup>      | 296.88±18.04            |
| P7             | 32.33±0.29                                | 8.70±0.59 x 10 <sup>5</sup>      | 302.08±20.41            |
| P8             | 32.83±0.58                                | 8.61±0.27 x 10 <sup>5</sup>      | 298.90±9.28             |

**Table S5. OP proliferation assay**

| No. of Passage | Time needed to reach ~80% confluence | M-OP Yield (No. of cell per well) | Population Increase (%) |
|----------------|--------------------------------------|-----------------------------------|-------------------------|
| P1             | 71.67±1.26                           | 1.07±0.50 x 10 <sup>6</sup>       | 558.59±26.28            |
| P2             | 73.50±1.80                           | 1.13±0.19 x 10 <sup>6</sup>       | 586.46±9.81             |
